# Supplementary material
Source: PubMed Central journal article supplement (PMC3108468)
Supplement: pr1009178_si_001.pdf [file pr1009178_si_001.pdf]

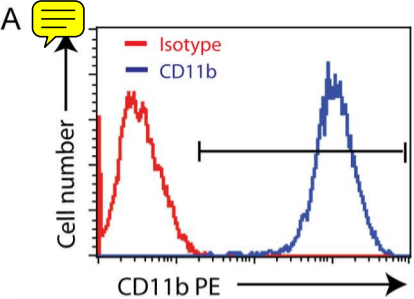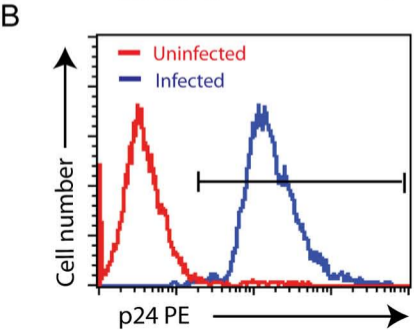

**C**

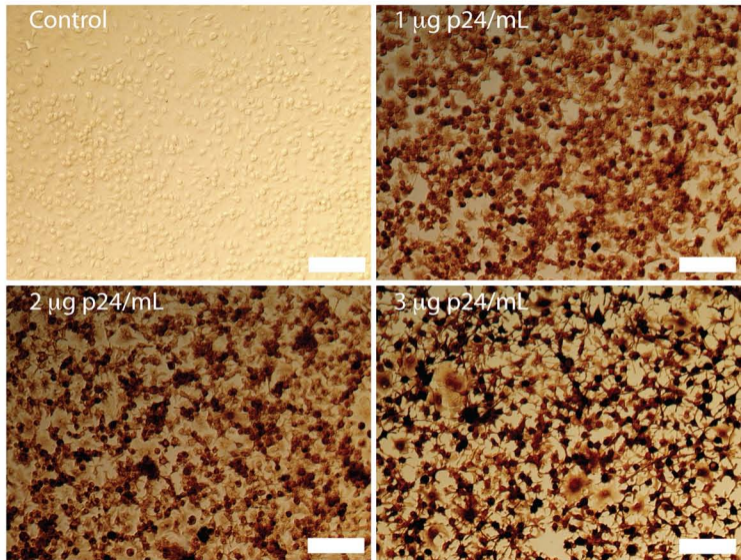

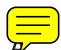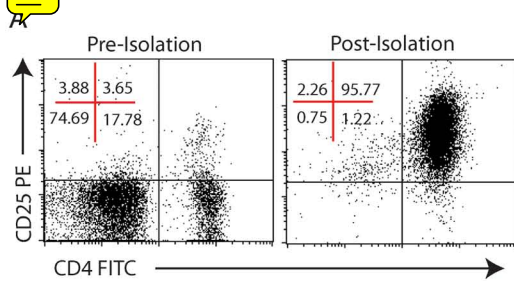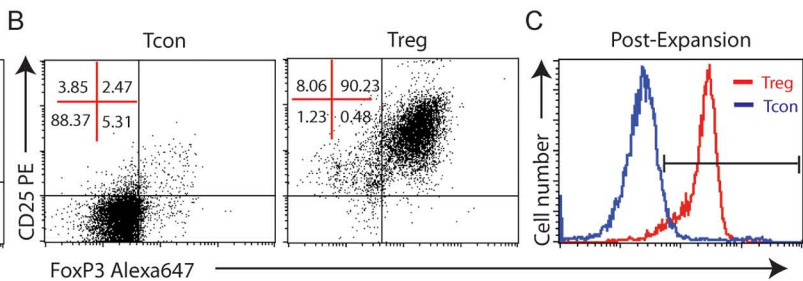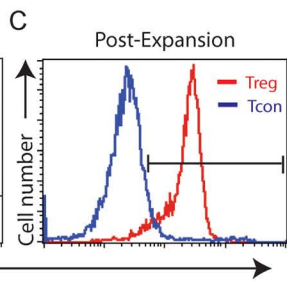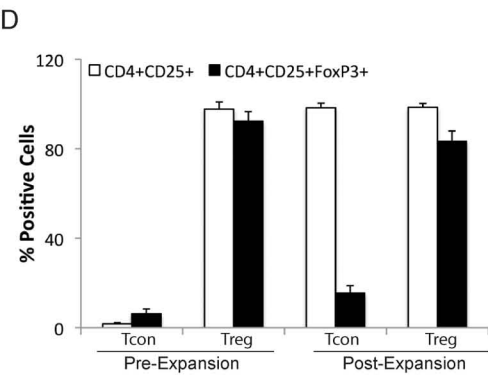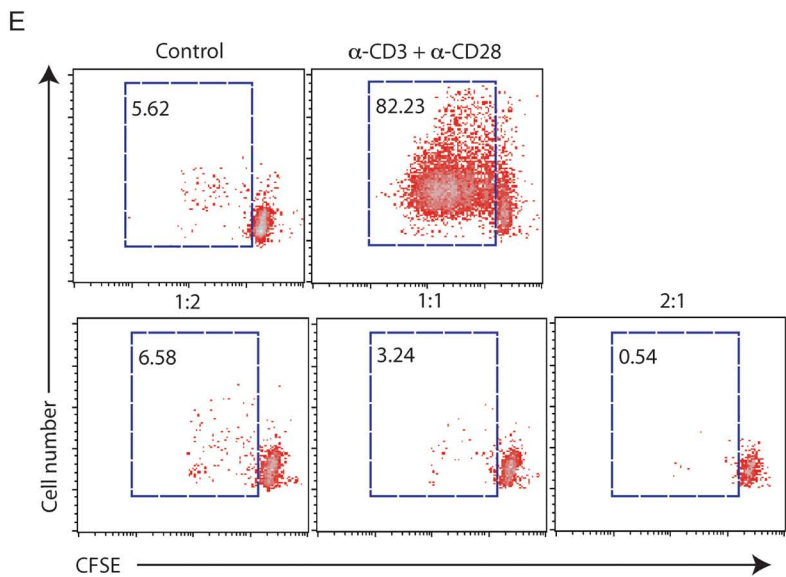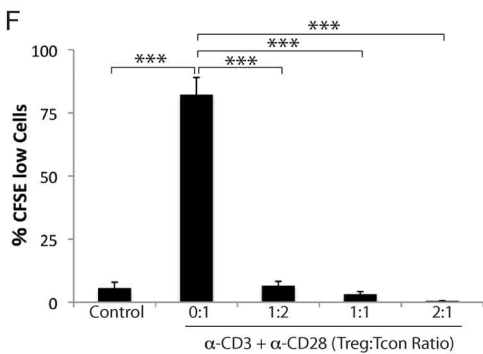

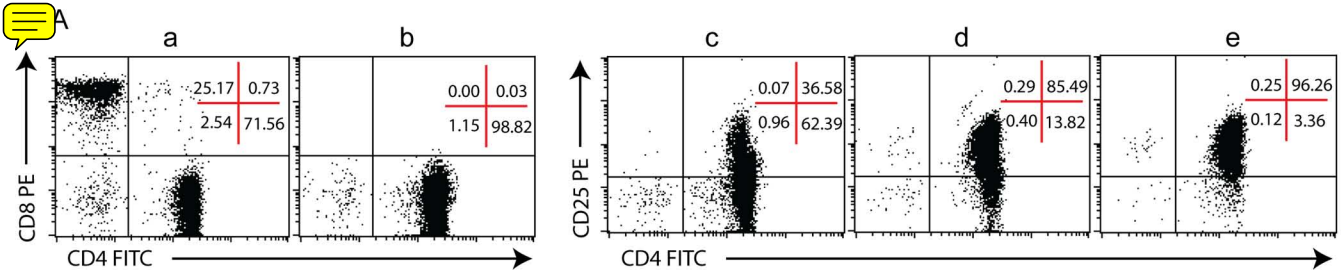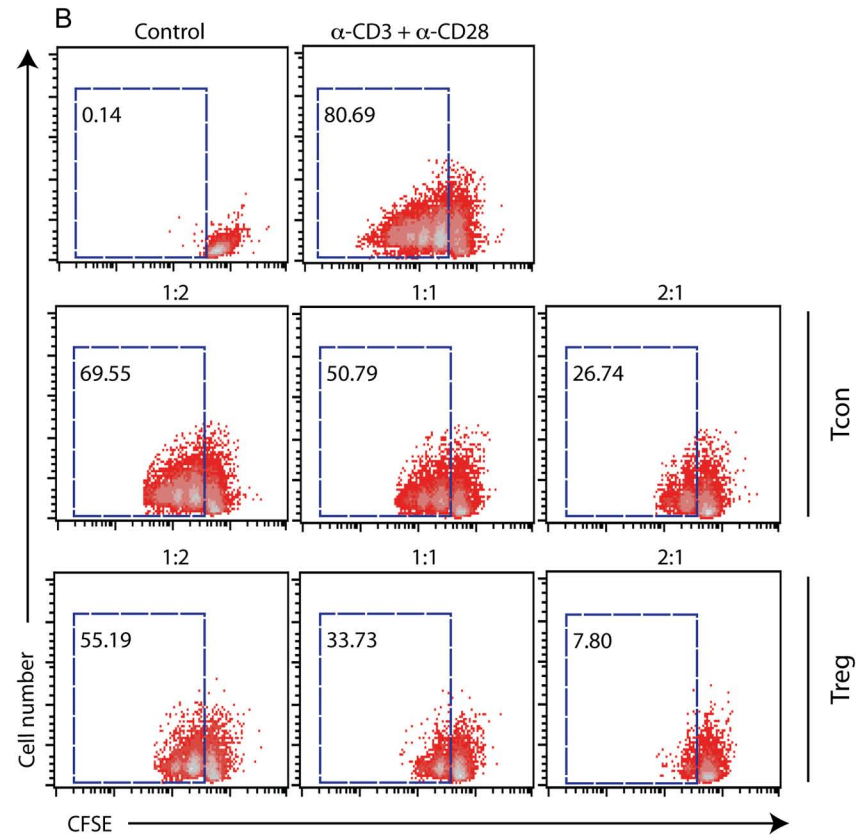

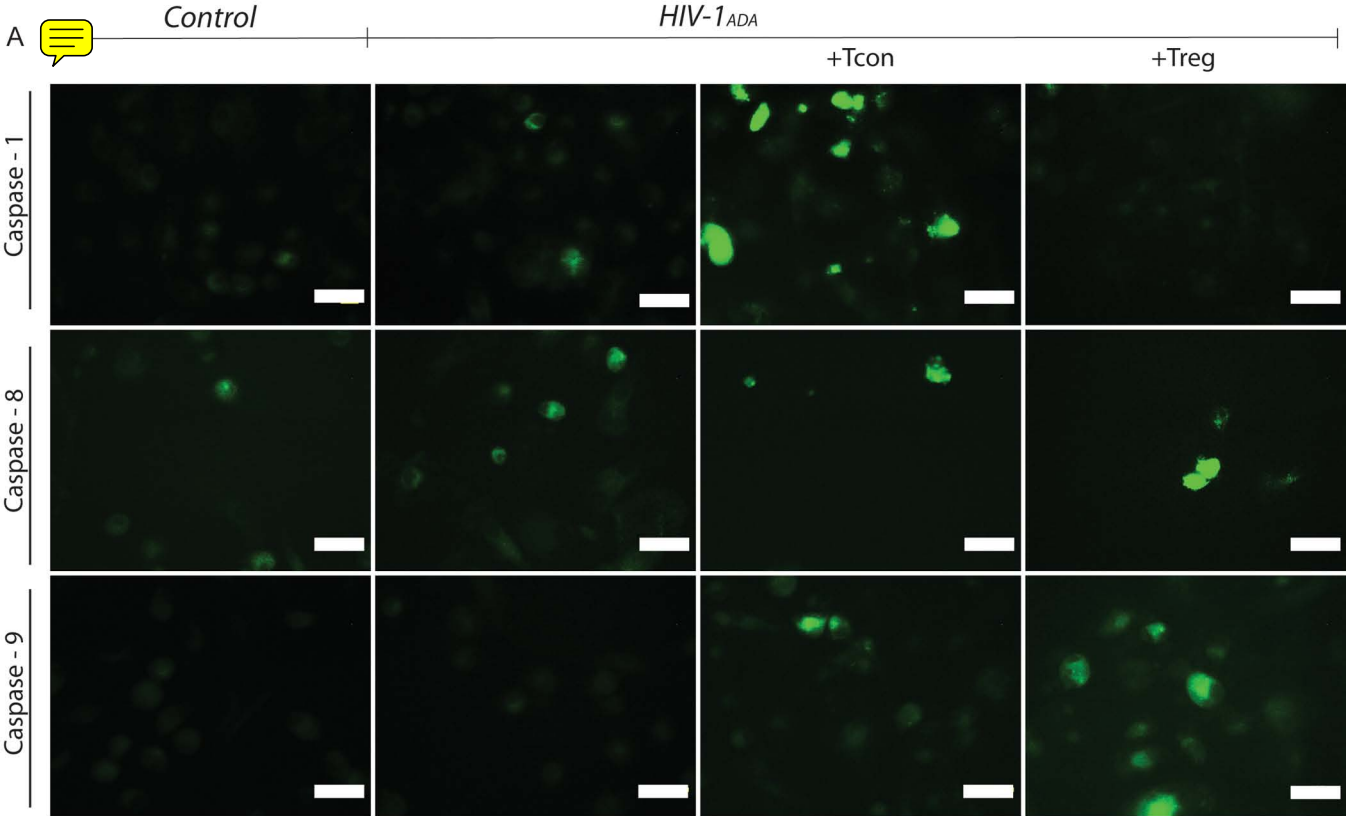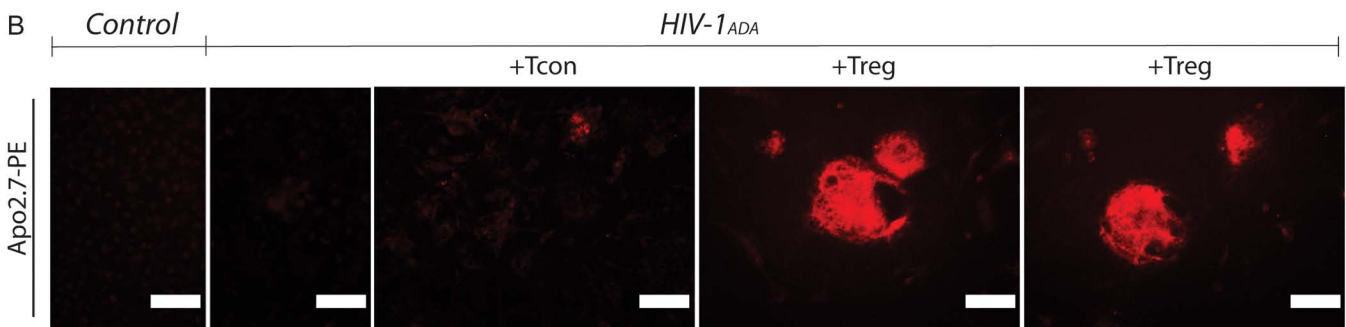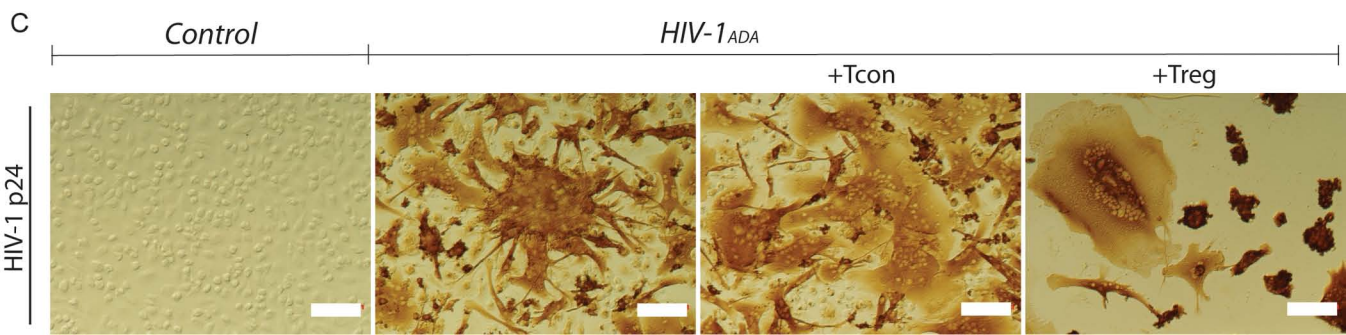

A

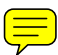

Isotype

Tcon

Treg

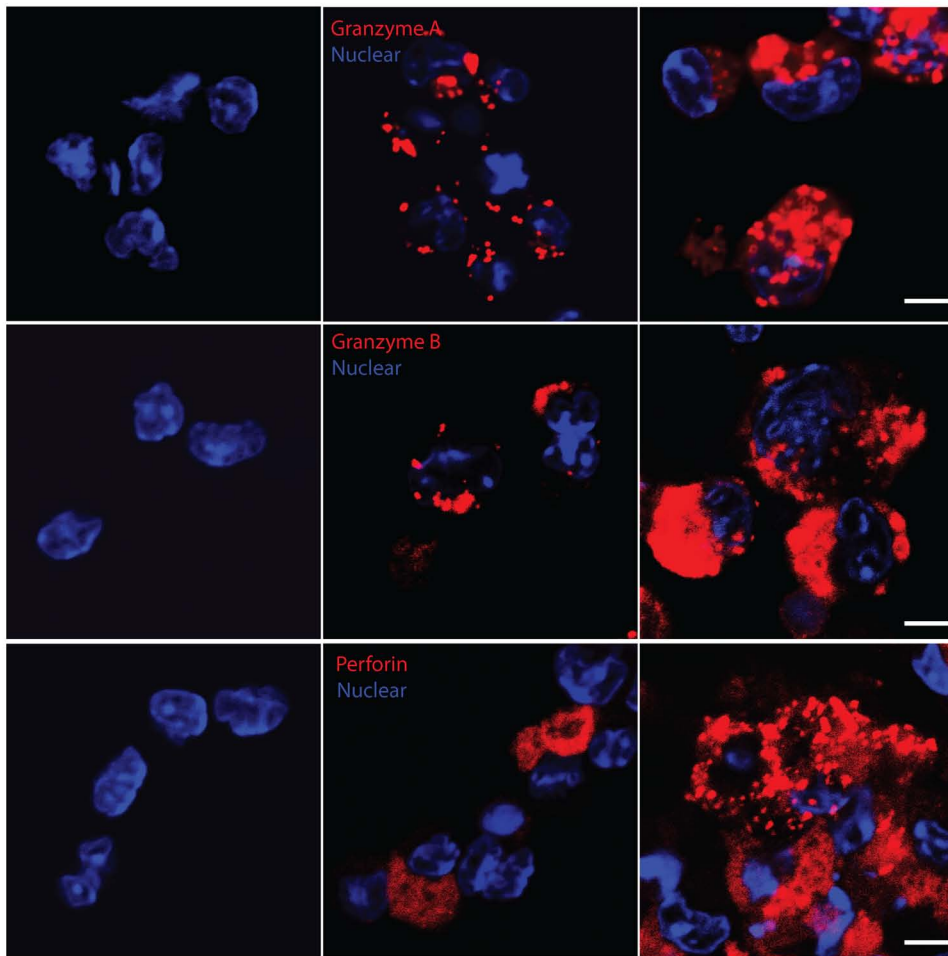

B

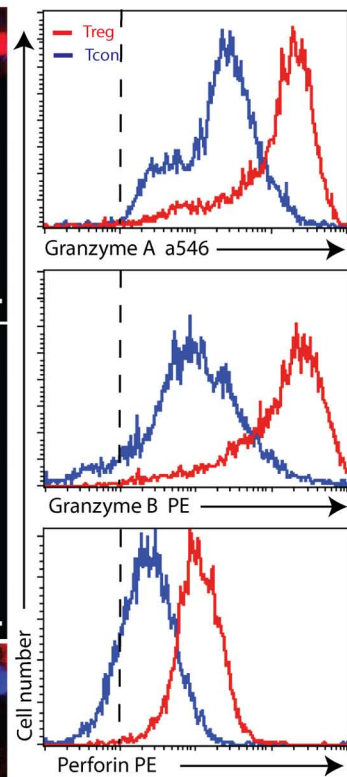

C

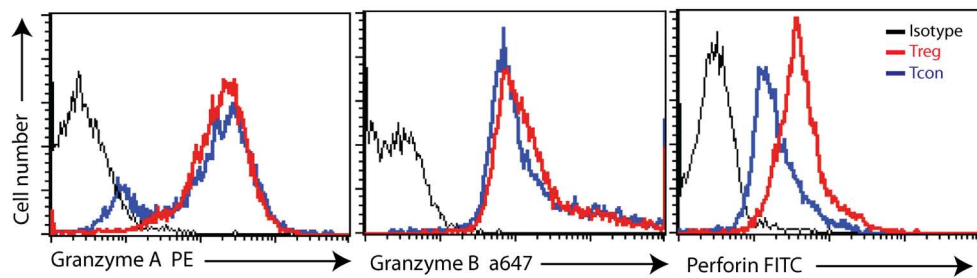

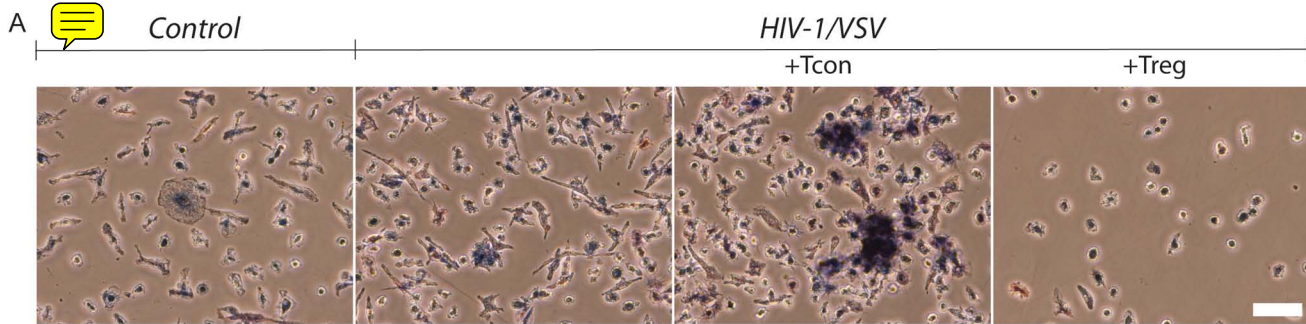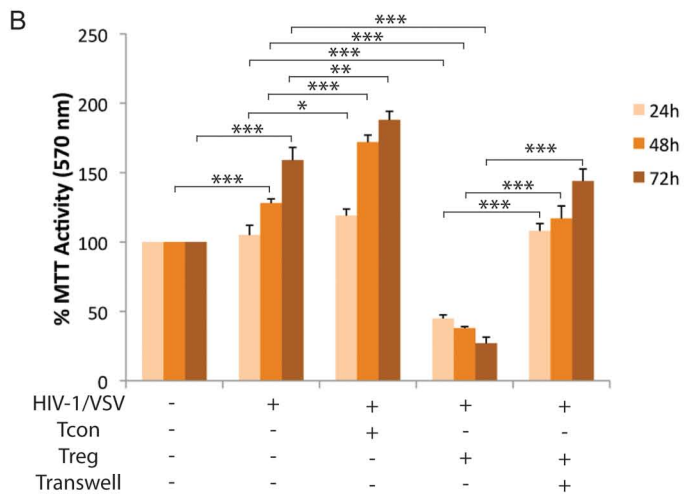

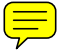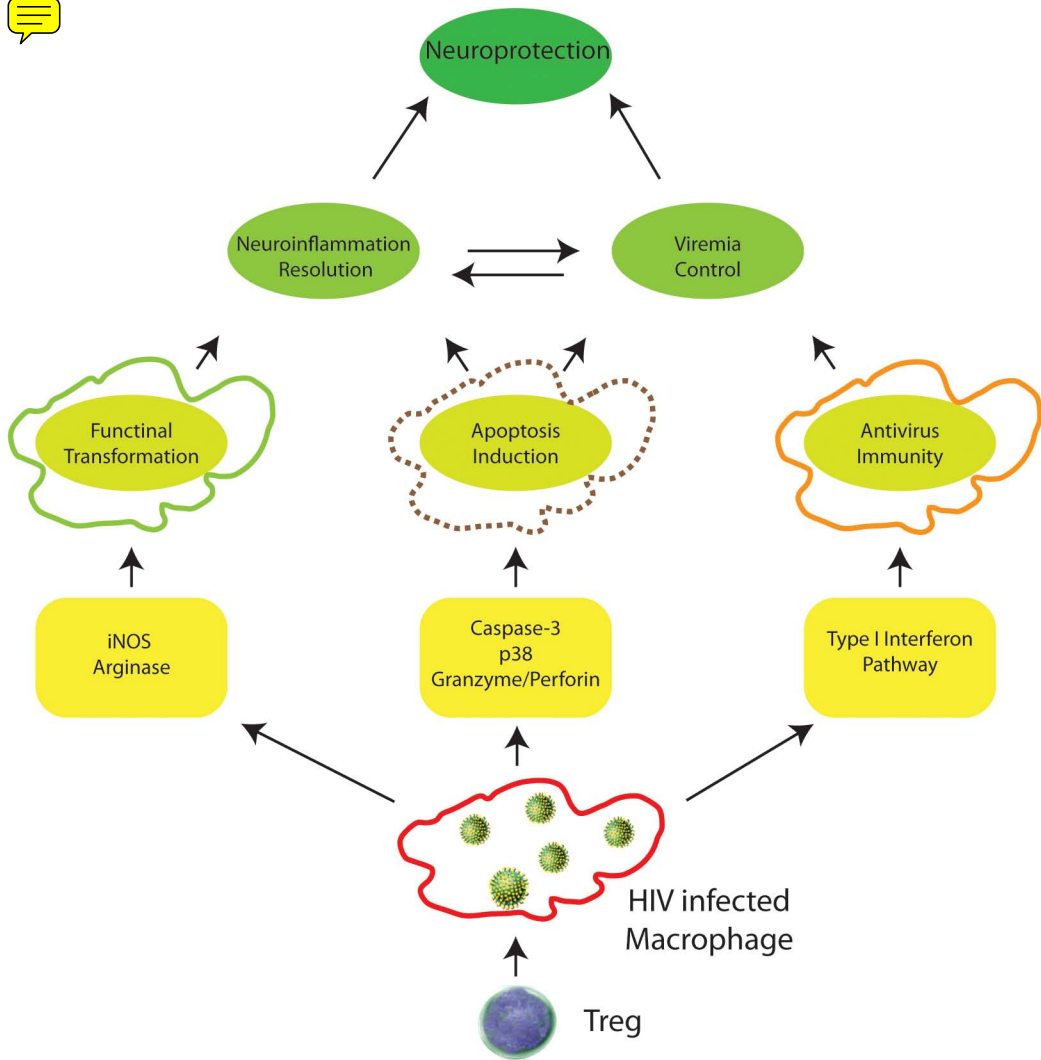

**Supplementary Table 1.** Concentration of Cytokines in BMM Conditioned Media

|           |        | Conditioned Medium 1 (pg/ml) |                 |                 |                    |                    |                   | Conditioned Medium 2 (pg/ml) |                    |                 |                 |                    |                    |                   |                        |
|-----------|--------|------------------------------|-----------------|-----------------|--------------------|--------------------|-------------------|------------------------------|--------------------|-----------------|-----------------|--------------------|--------------------|-------------------|------------------------|
|           |        | IL-12 <sup>a</sup>           | TNF- $\alpha^a$ | IFN- $\gamma^a$ | MCP-1 <sup>a</sup> | IL-10 <sup>a</sup> | IL-6 <sup>a</sup> | HIV-1 p24 <sup>b</sup>       | IL-12 <sup>a</sup> | TNF- $\alpha^a$ | IFN- $\gamma^a$ | MCP-1 <sup>a</sup> | IL-10 <sup>a</sup> | IL-6 <sup>a</sup> | HIV-1 p24 <sup>b</sup> |
| Control   |        | 32                           | 41              | 4               | 259                | 42                 | 3                 | 0                            | 25                 | 6               | 2               | 39                 | 30                 | 5                 | 0                      |
| HIV-1/VSV |        | 111                          | 164             | 68              | 1626               | 14                 | 16                | 249,000                      | 46                 | 29              | 14              | 252                | 12                 | 12                | 190,000                |
|           | + Tcon | 184                          | 362             | 696             | 3,048              | 1,502              | 43                | 130,000                      | 100                | 64              | 88              | 675                | 49                 | 21                | 112,000                |
|           | + Treg | 23                           | 11              | 12              | 103                | 5111               | 2                 | 46,000                       | 6                  | 4               | 3               | 46                 | 118                | 3                 | 21,000                 |

*a* = Cytokines were detected by cytometric bead array. *b* = HIV-1p24 were detected by ELISA.
